# Supplementary material
Source: PubMed Central journal article supplement (PMC1299223)
Supplement: 6-7400313s1.pdf [file 6-7400313s1.pdf]

**Supplementary Materials:**

**Table S1. Oligonucleotides used to construct DNA substrates**

| <b>Oligo #</b> | <b>Oligo nucleotide sequence</b>                                                            |
|----------------|---------------------------------------------------------------------------------------------|
| 1              | 5'-GATGTCAAGCAGTCCTAACTTTGAGGCAGAGTCC-3'                                                    |
| 2              | 5'TTAGGACTGCTTGACATC-3'                                                                     |
| 3              | 5'-AGTTAGGACTGCTTGACATC-3'                                                                  |
| 4              | 5'-GGACTCTGCCTCAAGACGGTAGTCAACGTG-3'                                                        |
| 5              | 5'-CACGTTGACTACCG-3'                                                                        |
| 6              | 5'-CACGTTGACTACCGTC-3'                                                                      |
| 7              | 5'GTTAAGATAGGTCTGCTTGGGATGTCAAGCAGTCCTAACTG<br>GAAATC TAGCTCTGTGGAGTTGAGGCAGAGTCCTTAAGC-3'  |
| 8              | 5'-CTCCACAGAGCTAGATTTCCAGTTAGGACTGCTTGACATC-3'                                              |
| 9              | 5'GCTTAAGGACTCTGCCTCAACTCCACAGAGCTAGATTTCC-3'                                               |
| 10             | 5'-GCTTAAGGACTCTGCCTCAACTCCACAGAGCTAGATTTCCC-3'                                             |
| 11             | 5'-GCTTAAGGACTCTGCCTCAA-3'                                                                  |
| 12             | 5'-CCAAGCAGACCTATCTTAAC-3'                                                                  |
| 13             | 5'-GCTTAAGGACTCTGCCTCAAATCGTCAGGGTTTCTAAAGAAG<br>CCGACGGTAGTCAACGTGCCAAGCAGACCTATCTTAAC-3'  |
| 14             | 5'-CACGTTGACTACCGTCGGCTTCTTTAGAAACCCTGACGAT-3'                                              |
| 15             | 5'-CAGTTGTTGAATGCAAAGAAGAAGTGCCATTAATACCGGTA<br>GTTAGGACTGCTTGACATCCCAAGCAGACCTATCTTAAC -3' |
| 16             | 5'-CAGTTGTTGAATGCAAAGAAGAAGTGCCATTAATACCGGT-3'                                              |

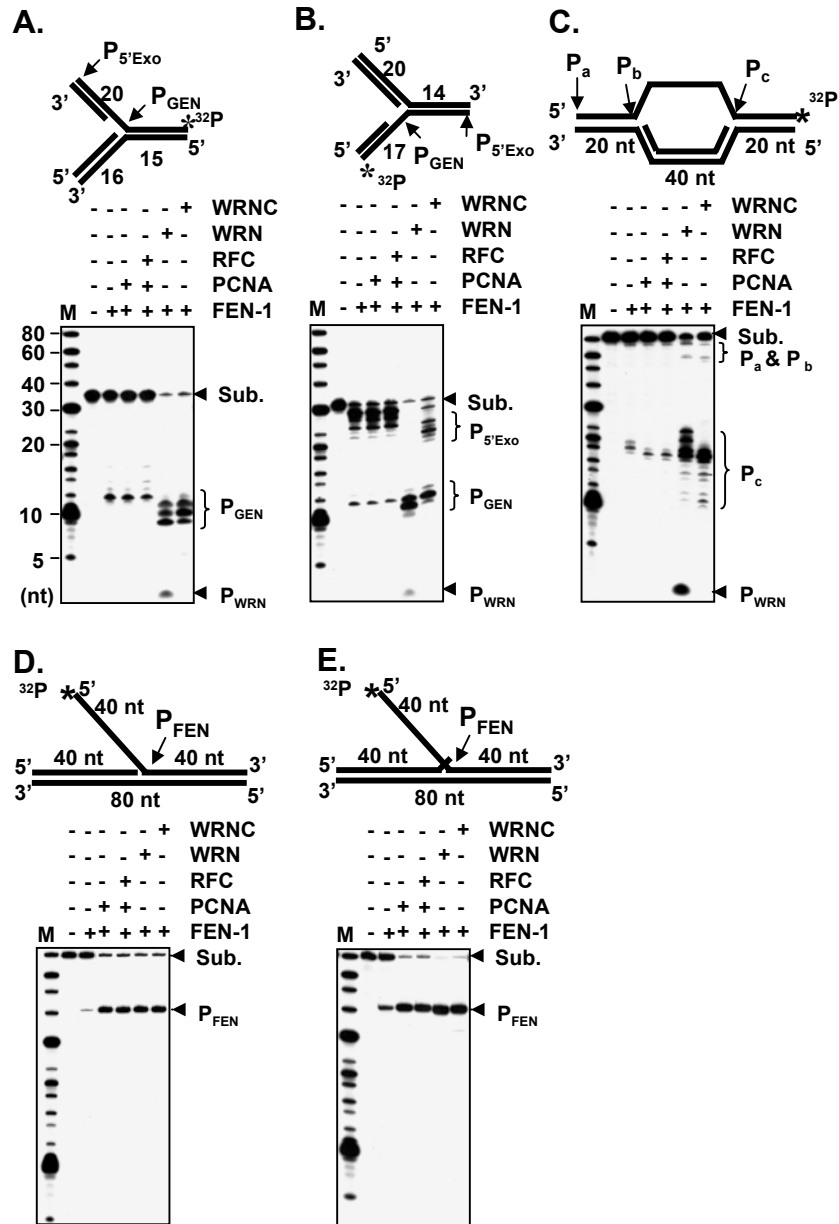

**Figure S1.** (A-C). WRN and PCNA effects on FEN-1's GEN activity. 1 pmol of FEN-1 were incubated with 1 pmol of 5' double-stranded flap substrates (A, Lagging), 3' double-stranded flap substrates (B, Leading), or bubble substrates (C) in the absence or presence of 5 pmol PCNA, WRN, WRNC, or 50 unit RFC. (D and E). WRN and PCNA effects on FEN-1's FEN activity. 0.1 pmol of FEN-1 were incubated with 1 pmol of normal flap (D) or double-flap (E) substrates in the absence or presence of 5 pmol PCNA, WRN, WRNC, or 50 unit RFC. Reactions were carried out for 30 minutes at 37 °C. DNA substrates and products were analyzed with sequencing PAGE.
